# Supplementary material for: Characterization of Interactions between the Soybean Salt-Stress Responsive Membrane-Intrinsic Proteins GmPIP1 and GmPIP2
Source: MDPI journal article supplement (doi:10.3390/agronomy11071312), 2021-06-28
Supplement: s1 [file s1]

## Supplementary materials

**\*Note:** Full GmPIPs peptide sequences are deposited at the end of the present file.

**Supplementary Table S1 The primers used for qRT-PCR.**

| Gene             | Forward primers       | Reverse primers         |
|------------------|-----------------------|-------------------------|
| <i>GmPIP1;1</i>  | GAGGGAAAAGAAGAGGAC    | CTTCGACGAGAAGGGGATG     |
| <i>GmPIP1;2</i>  | GAGGGAAGAGATGAGGATG   | ACTTGAAAGGAATGGCCCT     |
| <i>GmPIP1;3</i>  | GAGAGGGAGGAAGATGT     | CCTTGTCTTGAAAGGAAT      |
| <i>GmPIP1;4</i>  | GAGAGGGAGGAAGATGT     | CCTTGTCTTGAAATGGAATTG   |
| <i>GmPIP1;5</i>  | GAGAGCAAAGAGGAAGATGT  | CACAAAATTGGCTCCACCT     |
| <i>GmPIP1;6</i>  | GAGTAAAGAGGAAGAT      | CCTTGTCTTGAAAGGAA       |
| <i>GmPIP1;7</i>  | GAGGGGAAGGAGCAGGAT    | GGACTTGAAGGGAATGG       |
| <i>GmPIP1;8</i>  | GAGGGAAAAGAGGAAGAT    | GGATTTGAAGGGAATGG       |
| <i>GmPIP1;9</i>  | GAGAGGGAAGAAAGAT      | GGATTTGAAGTAATGAA       |
| <i>GmPIP1;10</i> | GAGCAGGTATATGAATT     | CGATTAAGTGCATCCAT       |
| <i>GmPIP2;1</i>  | TCGAAGGAAGTGAGCCAGCA  | TGGTAGGGTTGCTCCTGA      |
| <i>GmPIP2;2</i>  | TCGAAGGAAGTGAGCCAAGA  | GGTAGGGTTGCTCCTGA       |
| <i>GmPIP2;3</i>  | GCTAAAGATGTTGAGGT     | CGTTGCTTCTGAAGGATCCA    |
| <i>GmPIP2;4</i>  | GCTAAAGATGTTGAGGT     | GCGTTGCTCCTGAAGGATCCA   |
| <i>GmPIP2;5</i>  | GCCAAAGACGTTGAGCA     | AGTGTTGCTCCTGAATGATC    |
| <i>GmPIP2;6</i>  | GCGAAAGACGTTGAGCAG    | AGCGTTGCTCCTGAAGGATCCA  |
| <i>GmPIP2;7</i>  | GCGAAAGACATCGAAACT    | CAGGTTTGAGGAGCTCCTGA    |
| <i>GmPIP2;8</i>  | GCCAAAGACCTCGAAACG    | CAGGTTTGAGGAGCTCCTGA    |
| <i>GmPIP2;9</i>  | GCTAAGCATGATGTTGA     | AATAGTGGGGTTGCTCCTGA    |
| <i>GmPIP2;10</i> | GCTAAGCATGATGTTGAG    | AATAGCGGGGTTGCTCCTGAAT  |
| <i>GmPIP2;11</i> | TAAGCATGATGTTGAG      | CGGGGTTGCTCCTGAAT       |
| <i>GmPIP2;12</i> | GCCTAAGAATATCGAGC     | ACTTCCCAGTAGATTCCATA    |
| <i>GmPIP2;13</i> | AGCGTGTTTTGGCAGGA     | TTATGGGGGTTACTCCTGAATGA |
| <i>GmPIP2;14</i> | GCGAAGGACGTTGAGGTT    | ATTATGGGGGTTACTCCTGAA   |
| <i>GmTUBB3</i>   | GGAGGGTGAGTGAGCAGTTC  | GCCGCATAACATTGTTCCCA    |
| <i>GmActin</i>   | CGGTGGTTCTATCTTGGCATC | GTCTTTCGCTTCAATAACCCTA  |

**Supplementary Table S2 The primers used for yeast two-hybrid assays (AD and BD).**

| <b>Gene</b>      | <b>Forward primers</b>                 | <b>Reverse primers</b>                 |
|------------------|----------------------------------------|----------------------------------------|
| <i>GmPIP1;2</i>  | cgCCATGGcaATGGAGGGAAGAG<br>ATGAGGATG   | cGGAATTTCATTTTGACTTGAAA<br>GGAATGGCCCT |
| <i>GmPIP1;3</i>  | cgCCATGGcaATGGAGAGGGAGG<br>AAGATGT     | cGGAATTCTCAACCCCTTGTCTT<br>GAAAGGAA    |
| <i>GmPIP1;4</i>  | cgCCATGGcaATGGAGAGGGAGG<br>AAGATGT     | cGGAATTCTCAACCCCTTGTCTT<br>GAATGGAATT  |
| <i>GmPIP1;5</i>  | cgCCATGGcaATGGAGAGCAAAG<br>AGGAAGATGT  | cGGAATTCTCAAGCCCTTGTCTT<br>GAAAGGGA    |
| <i>GmPIP1;6</i>  | cgCCATGGcaATGGAGAGTAAAG<br>AGGAAGAT    | cGGAATTCTCAAGCCCTTGTCTT<br>GAAAGGA     |
| <i>GmPIP1;7</i>  | cgCCATGGcaATGGAGGGGAAGG<br>AGCAGGAT    | cGGAATTCTCACTTGGACTTGA<br>AGGGAAT      |
| <i>GmPIP1;8</i>  | cgCCATGGcaATGGAGGGAAAAG<br>AGGAAGAT    | cGGAATTCTCAACTGGATTGAA<br>GGGAAT       |
| <i>GmPIP2;2</i>  | cgCCATGGcaATGTCTGAAGGAAG<br>TGAGCCAAGA | cGGAATTCTCAGTTGGTAGGGTT<br>GCTCCTGA    |
| <i>GmPIP2;4</i>  | cgCCATGGcaATGGCTAAAGATGT<br>TGAGGT     | cGGAATTCTCAAGCGTTGCTCCT<br>GAAGGATCCA  |
| <i>GmPIP2;6</i>  | cgCCATGGcaATGGCGAAAGACG<br>TTGAGCAG    | cGGAATTCTCAAGCGTTGCTCCT<br>GAAGGATCCA  |
| <i>GmPIP2;8</i>  | cgCCATGGcaATGGCCAAAGACC<br>TCGAAACG    | cGGAATTCTCACAGGTTTGAGG<br>AGCTCCTGA    |
| <i>GmPIP2;9</i>  | cgCCATGGcaATGGCTAAGCATG<br>ATGTTGA     | cGGAATTCTCAAATAGTGGGGTT<br>GCTCCTGA    |
| <i>GmPIP2;11</i> | cgCCATGGcaATGGCTAAGCATG<br>ATGTTGAG    | cGGAATTCTCAAATAGCGGGGT<br>TGCTCCTGAAT  |
| <i>GmPIP2;13</i> | cgCCATGGcaATGAGCGTGTTTTG<br>GCAGGA     | cGGAATTCTCAATTATGGGGGT<br>ACTCCTGAATGA |

**Supplementary Figure S1:** Multiple alignment of soybean *GmPIP1* type and *GmPIP2* type aquaporins using Clustal X. *GmPIP1*s had longer N-terminal ends and *GmPIP2*s had longer C-terminal ends. The *GmPIPs* contained six transmembrane domains (rectangles) and two conserved NPA motifs (red circles). The part of the pictures demonstrated below was output directly by the software. In the software ‘;’ was not allowed to appear in the name of a sequence, so we used ‘-’ instead. For example, *GmPIP1-5* means *GmPIP1*;5. (It is the same in supplementary figure 2 & 3)

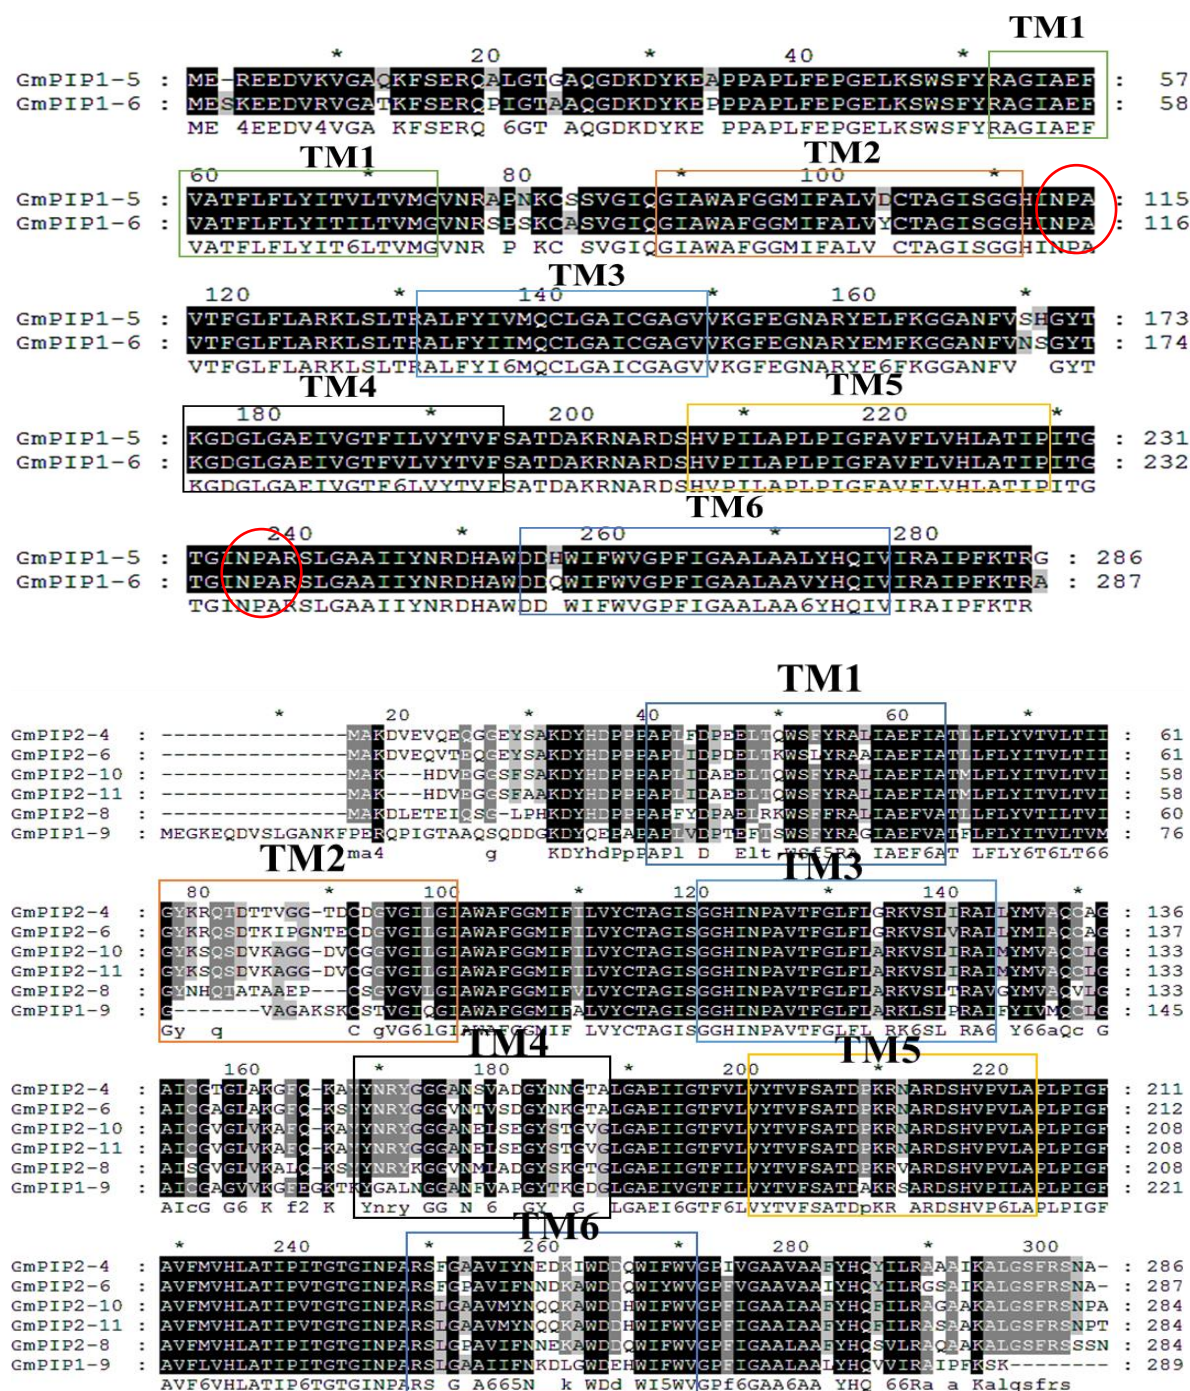

**Supplementary Figure S2:** The phylogenetic tree of GmPIPs. The aquaporins of which the gene expression levels showed significant variation after salt-stress were marked with asterisks; the dot in blue indicated the GmPIPs selected for yeast two-hybrid assays (In supplementary figure 3 is the same).

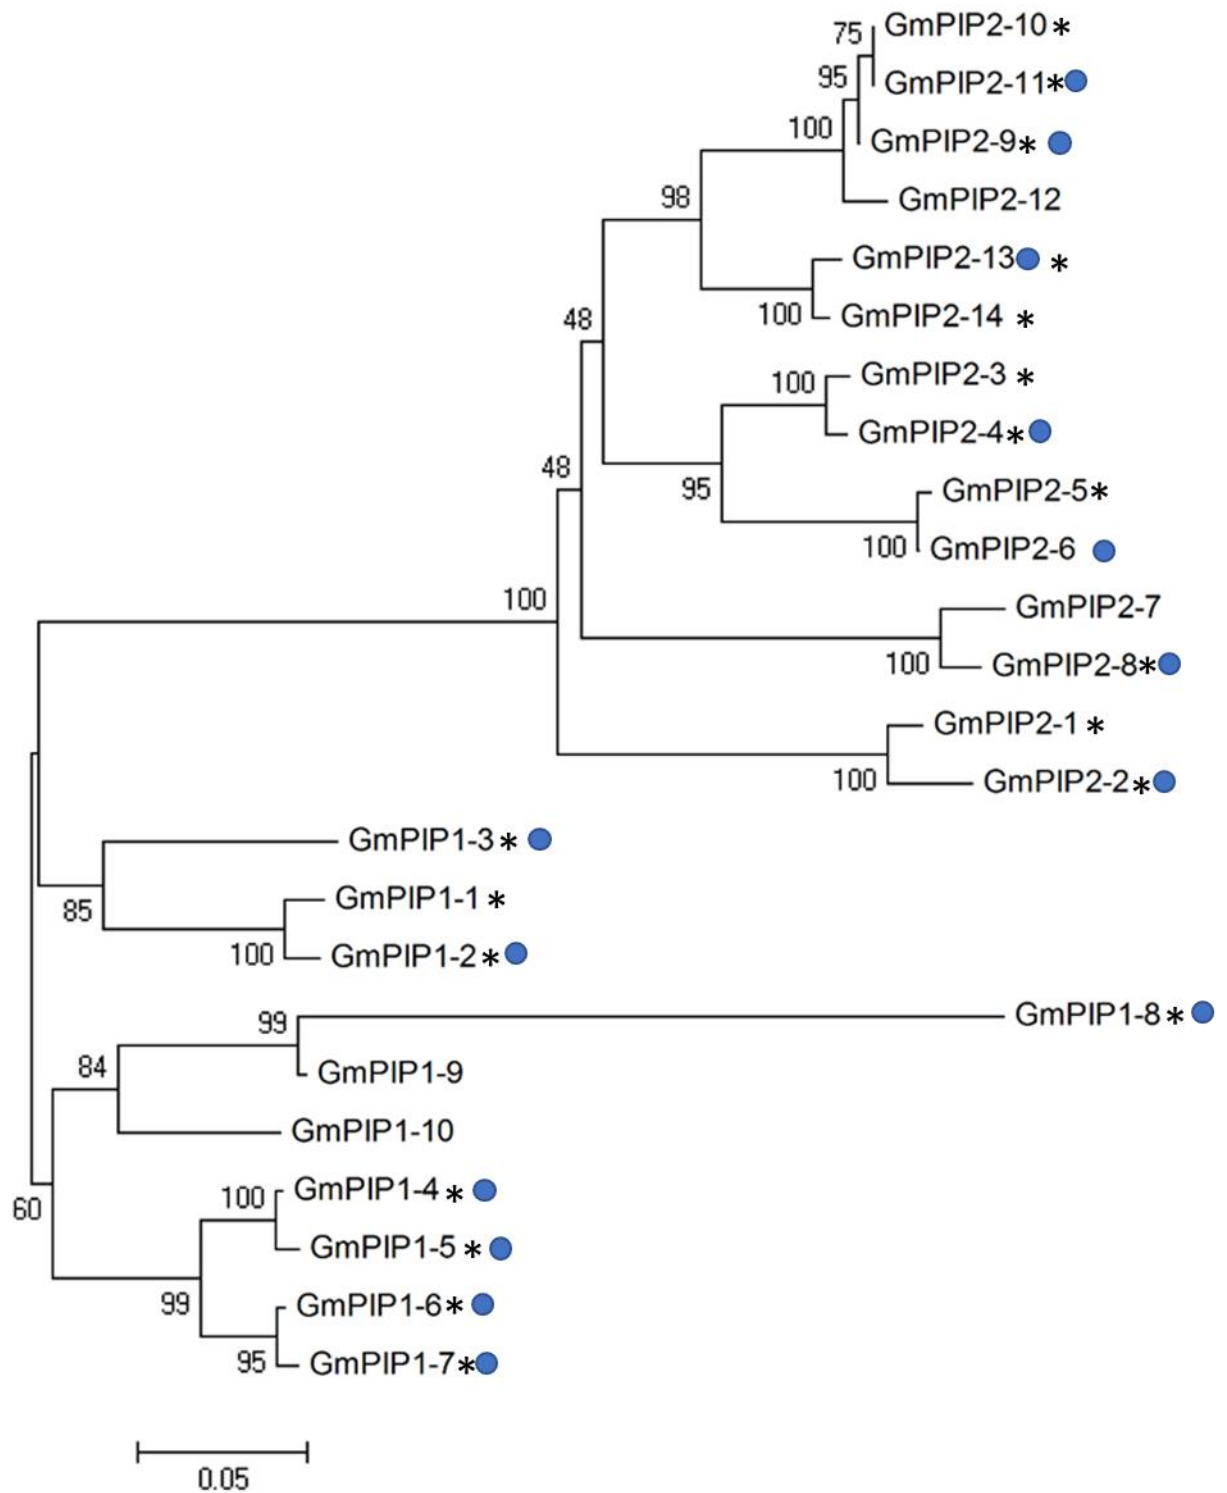

Supplementary Figure S3: The phylogenetic tree of GmPIPs, AtPIPs and OsPIPs.

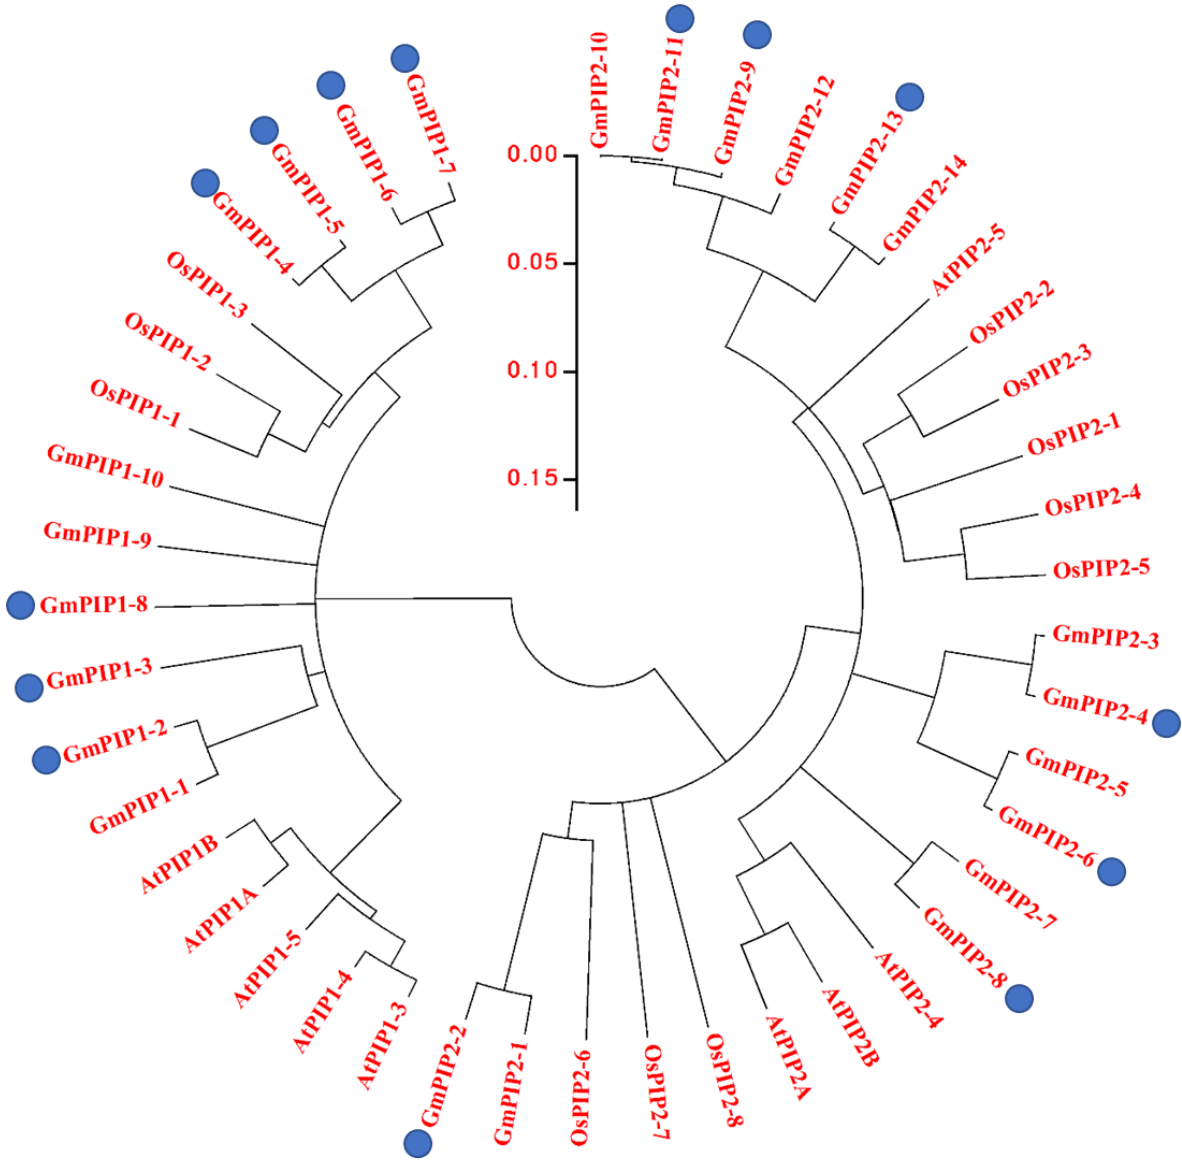

## Full peptide sequences of GmPIPs

### >GmPIP1;1

MEGKEEDVRVGANRYGERQPIGTAAQAKDYREPPSAPLFEAGELSS  
WSFYRAGIAEFVATFLFLYITVLTVMGVAKSKSKCSTVGIQGIAWAFGGMI  
FALVYCTAGISGGHINPAVTFGLFLARKLSMTRAIFYIIMQCLGAICGAGV  
VKGFEPLYERLGGGANTIAKGYTNIAGLGAEIVGTFVLVYTVFSATDAK  
RNARDSHVPILAPLPIGFAVFLVHLATIPVTGTGINPARSLGAAIIFNKDQA  
WDDH

### >GmPIP1;10

MEGKEEDVSLGANKFSERQPIGTAAQSQDDGKDYTEPPAPLFEPSSEL  
TSWSFYRAGIAEFVATFLFLYITILTVMGVNRSSSKCATVGIQGIAWAFGG  
MIFALVYCTAGISGGHINPAVTFGLFLARKLSLTRALFYMVVMQVLGAIVG  
AGVVKGFEKGKTFYQGHNNGGANFVAPGYTKGDGLGAEIVGTFILVYTVFS  
ATDAKRSARDSHVPILAPLPIGFAVFLVHLATIPITGTGINPARSLGAAIIFN  
KDLGWDDHWIFWVGPFVGAALAAALYHQVVIRAIPFKSS\*

### >GmPIP1;2

MEGKEEDVRVGANRYGERQPIGTAAQAKDYREPPSAPLFEPEGELSSW  
SFYRAGIAEFVATFLFLYITVLTVMGVFKSKSKCSTVGIQGIAWAFGGMIFA  
LVYSTAGISGGHINPAVTFGLFLARKLSLTRAIFYIIMQCLGAICGAGVVKG  
FEPHLYERLGGGANTIAKGYTNSAGLGAEIVGTFVLVYTVFSATDAKRNA  
RDSHVPILAPLPIGFAVFLVHLATIPVTGTGINPARSLGAAIIFNKDQAWDD  
HWIFWVGPFIGAALAAALYHQIVIRAIPFSSK\*

### >GmPIP1;3

LRLPHSHIHIEVKLALKMEGRDEDVRVGANRYGERQPIGTAAQTQDA  
KDYREAPPAPLFEPRELTSWSFYRAGIAEFVATFLFLYVTVLTVMGVAKSP  
SKCSTVGVQGIAWSFGGMIFALVYCTAGISGGHINPAVTFGLFLARKLSLT  
RTVFYIMIMQCLGAICGAAVVKGFSNQYERLGGGANTLSKGYSKGDGL

**GAEIVGTFILVYTVFSATDAKRNARDSHVPILAPLPIGFAVFLVHLATIPITG  
TGINPARSLGAALVYNKDQAWDNHWIFWVGPFIGAALAALYHQIVLRAIP  
FKSK\***

**>GmPIP1;4**

**MEREEDVKVGAQKFSEERQALGTGAKSDKDYKEAPPAPLFEPGELKS  
WSFYRAGIAEFVATFLFLYITVLTVMGVNRAPNKCSSVGIQGIAWAFGGMI  
FALVYCTAGISGGHINPAVTFGLFLARKLSLTRAIFYIVMQCLGAICGAGV  
VKGFEKNARYELFKGGANFVSHGYTKGDGLGAEIVGTFILVYTVFSATDA  
KRNARDSHVPILAPLPIGFAVFLVHLATIPITGTGINPARSLGAALHYNRDHA  
WDDHWIFWVGPFIGAALAIFYHQIVIRAIPFKTRG\***

**>GmPIP1;5**

**MEREEDVKVGAQKFSEERQALGTGAQGDSDKDYKEAPPAPLFEPGELKS  
WSFYRAGIAEFVATFLFLYITVLTVMGVNRAPNKCSSVGIQGIAWAFGGMI  
FALVDCTAGISGGHINPAVTFGLFLARKLSLTRALFYIVMQCLGAICGAGV  
VKGFEKNARYELFKGGANFVSHGYTKGDGLGAEIVGTFILVYTVFSATDA  
KRNARDSHVPILAPLPIGFAVFLVHLATIPITGTGINPARSLGAALHYNRDHA  
WDDHWIFWVGPFIGAALAIFYHQIVIRAIPFKTRG\***

**>GmPIP1;6**

**MESKEEDVRVGATKFSEERQPIGTAAQGDSDKDYKEPPPAPLFEPGELKS  
WSFYRAGIAEFVATFLFLYITILTVMGVNRSPSKCASVGIQGIAWAFGGMIF  
ALVYCTAGISGGHINPAVTFGLFLARKLSLTRALFYIIMQCLGAICGAGVV  
KGFEGNARYEMFKGGANFVNSGYTKGDGLGAEIVGTFVLVYTVFSATDA  
KRNARDSHVPILAPLPIGFAVFLVHLATIPITGTGINPARSLGAALHYNRDHA  
WDDQWIFWVGPFIGAALAIFYHQIVIRAIPFKTRA\***

**>GmPIP1;7**

**MESKEEDVNVGANKFSEERQPIGTAAQGGGSDKDYKEAPPAPLFEPGEL  
KSWSFYRAGIAEFVATFLFLYITILTVMGVNRSPSKCASVGIQGIAWAFGG**

MIFALVYCTAGISGGHINPAVTFGLFLARKLSLTRALFYIIMQCLGAICGAG  
VVKGFEGNANYELFKGGANFVNSGYTKGDGLGAEIVGTFVLVYTVFSAT  
DAKRNARDSHVPILAPLPIGFAVFLVHLATIPITGTGINPARSLGAAIYNRD  
HAWDDQWIFWVGPFIGAALAAVYHQIVIRAIPFKTRA\*

>GmPIP1;8

MEGKEQDVSLGANKFPERQPIGTAAQSQDDGKDYQEPAPAPLVDPT  
FTSWSFYRAGIAEFVATFLFLYITVLTVMGVAGAKSKCSTVGIQGIAWAFG  
GMIFALVYCTAGISGGHINPAVTFGLFLARKLSLPRAIFYIVMQCLGAICG  
AGVVKGFEGKTKYGTLNNGGANFVAPGYTKGDGLGAEIVGTFVLVYTVFS  
ATDAKRNARDSHVPVSPPPSVENLNCFFSLKKKYYFCGLNLIVWVEYMS  
RFWHLCLLGSRCSWFTWQPSLSPALVSTLLVVLVLLSSSTRTLVGMITGSS  
GWDLSLVLHLQHSTTRS\*

>GmPIP1;9

MEGKEQDVSLGANKFPERQPIGTAAQSQDDGKDYQEPAPAPLVDPT  
FTSWSFYRAGIAEFVATFLFLYITVLTVMGVAGAKSKCSTVGIQGIAWAFG  
GMIFALVYCTAGISGGHINPAVTFGLFLARKLSLPRAIFYIVMQCLGAICG  
AGVVKGFEGKTKYGALNNGGANFVAPGYTKGDGLGAEIVGTFILVYTVFS  
ATDAKRSARDSHVPILAPLPIGFAVFLVHLATIPITGTGINPARSLGAAIIFN  
KDLGWDEHWIFWVGPFIGAALAAALYHQVVIRAIPFKSK\*

>GmPIP2;1

MSKEVSQQRKDYVDPPPAPLIDLAEIKLWSFYRALIAEFIATLLFLYVT  
VATVIGHKKQTGPCDGVGLLGIAWAFGGMIFVLVYCTAGISGGHINPAVTF  
GLFLARKVSLIRALFYMVAQCLGAICGVGLVKAFMKHSYNSLGGGANSV  
SAGYNKGSALGAEIIGTFVLVYTVFSATDPKRSARDSHIPVLAPLPIGFAVF  
MVHLATIPITGTGINPARSEFGAAVIYNNGKVWDDHWIFWVGPFVGALAA  
AAYHQYILRAAAIKALGSFRSNPTN\*

>GmPIP2;10



MAKHDVEGGSFSAKDYHDPPPAPLIDAEELTQWSFYRALIAEFIATML  
FLYITVLTVIGYKSQSDVKAGGDVCGGVGILGIAWAFGGMIFILVYCTAGI  
SGGHINPAVTFGLFLARKVSLIRAIMYMVAQCLGAICGVGLVKAFQKAYY  
NRYGGGANELSEGYSTGVGLGAEIIGTFVLVYTVFSATDPKRNARDSHVP  
VLAPLPIGFAVFMVHLATIPVTGTGINPARSLGAAVMYNQQKAWDDHWIF  
WVGPFIGAAIAAFYHQFILRAGAAKALGSFRSNPAI\*

>GmPIP2;11

MAKHDVEGGSFSAKDYHDPPPAPLIDAEELTQWSFYRALIAEFIATML  
FLYITVLTVIGYKSQSDVKAGGDVCGGVGILGIAWAFGGMIFILVYCTAGI  
SGGHINPAVTFGLFLARKVSLIRAIMYMVAQCLGAICGVGLVKAFQKAYY  
NRYGGGANELSEGYSTGVGLGAEIIGTFVLVYTVFSATDPKRNARDSHVP  
VLAPLPIGFAVFMVHLATIPVTGTGINPARSLGAAVMYNQQKAWDDHWIF  
WVGPFIGAAIAAFYHQFILRASAANKALGSFRSNPTI\*

>GmPIP2;12

MAKHDVEGGSFSAKDYHDPPPAPLIDAEELTQWSFYRALIAEFIATLL  
FLYITVLTVIGYKSQSDVKAGGDVCGGVGILGIAWAFGGMIFILVYCTAGI  
SGGHINPAVTFGLFLARKVSLIRAIMYMVAQCLGAMCGVGLVKAFQKAY  
YNRYGGGANELSEGYSTGVGLGAEIIGTFVLVYTVFSATDPKRNARDSHV  
PVLAPLPIGFAVFMVHLATIPVTGTGINPARSFGAAVMYNQKKAWDDQWI  
FWVGPFIGAAIAAFYHQFILRASAANKAVGSFRSNPTI\*

>GmPIP2;13

MSVFWQEGGMAKDVEVAERGSFSGKDYQDPPPAPLIDAEELTKWSF  
YRALIAEFIATLLFLYITVLTVIGYNHQTDLKENGEICGGVGILGIAWAFGG  
MIFILVYCTAGISGGHINPAVTFGLFLARKVSLIRAIMYMVAQCLGAICGV  
GLVKAFQKSYFNKYGGGANS LAAGYSTGTGLGAEIIGTFVLVYTVFSATD  
PKRNARDSHVPVLAPLPIGFAVFMVHLATIPVTGTGINPARSLGAAVIYNQ  
DKPWDDHWIFWVGPFIGAAIAAFYHQFILRAGAAKALGSFRSNPHN\*

**>GmPIP2;14**

**MAKDVEVAERGSFSGKDYQDPPAPLIDAEELTKWSFYRALIAEF  
LLFLYITVLTVIGYKHQTDHADACGGVGILGIAWAFGGMIFILVYCTAGIS  
GGHINPAVTFGLFLARKVSLIRAIMYMVAQCLGAICGVGLVKAFQKSYFN  
KYGGGANSADGYSTGTGLGAEIIGTFVLVYTVFSATDPKRNARDSHVPV  
LAPLPIGFAVFMVHLATIPVTGTGINPARSLGAAVIYNQDKPWDDHWIFW  
VGPFIGAAIAAFYHQFILRAGAAKALGSFRSNPHN\***

**>GmPIP2;2**

**MSKEVSQEGLQRKDYVDPPAPLFDLAEIKLWSFYRALIAEFIASLLFL  
YVTVATIIGHKKQTGPCDGVGLLGIAWSFGGMIFVLVYCTAGISGGHINPA  
VTFGLFLARKVSLIRAVFYMVAQCLGAICGVGLVKAFMKHSYNSLGGGA  
NSVSAGYNKGSALGAEIIGTFVLVYTVFSATDPKRSARDSHVPVLA  
PLPIGFAVFMVHLATIPITGTGINPARSLGAAVIYNNGKVVDEHWIFWVG  
PLVGA LAAAAYHQYILRAGAIKALGSFRSNPTN\***

**>GmPIP2;3**

**MAKDVEVQEQGGEYSADYHDPPAPLFDPEELTQWSFYRALIAEFI  
ATLLFLYVTVLTIHGYKRQTDATLGGTECDGVGILGIAWAFGGMIFILVY  
CTAGISGGHINPAVTFGLFLGRKVSLIRALLYMVAQCAGAICTGLAKGFQ  
KSYYNRYGGGANSVADGYNNGTALGAEIIGTFVLVYTVFSATDPKRNARD  
SHVPVLA  
PLPIGFAVFMVHLATIPITGTGINPARSFGAAVIYNKDKIWDDQ  
WIFWVGPIVGA AVAAFYHQYILRAAAIKALGSFRSNA\***

**>GmPIP2;4**

**MAKDVEVQEQGGEYSADYHDPPAPLFDPEELTQWSFYRALIAEFI  
ATLLFLYVTVLTIHGYKRQTDTTVGGTDCDGVGILGIAWAFGGMIFILVY  
CTAGISGGHINPAVTFGLFLGRKVSLIRALLYMVAQCAGAICTGLAKGFQ  
KAYYNRYGGGANSVADGYNNGTALGAEIIGTFVLVYTVFSATDPKRNARD  
SHVPVLA  
PLPIGFAVFMVHLATIPITGTGINPARSFGAAVIYNEDKIWDDQ**

WIFWVGPIVGAAVAIFYHQYILRAAAIKALGSFRSNA\*

>GmPIP2;5

MAKDVEQVTEQGEYSADYHDPPPAPLIDPDELTKWSLYRAAIAEFIA  
TLLFLYITVLTHIGYKRQSDTKIPGNTECDGVGILGIAWAFGGMIFILVYCT  
AGISGGHINPAVTFGLFLGRKVS LVRALLYMIAQCAGAICGAGLAKGFQK  
SYNRYGGGVNTVSDGYNKG TALGAEIIGTFVLVYTVFSATDPKRSARDS  
HVPVLAPLPIGFAVFMVHLATIPVTGTGINPARSFGPAVIFNNDKAWDDQW  
IYWVGPFVGAAVAIFYHQYILRAAAIKALGSFRSNT\*

>GmPIP2;6

MAKDVEQVTEQGEYSADYHDPPPAPLIDPDELTKWSLYRAAIAEFIA  
TLLFLYITVLTHIGYKRQSDTKIPGNTECDGVGILGIAWAFGGMIFILVYCT  
AGISGGHINPAVTFGLFLGRKVS LVRALLYMIAQCAGAICGAGLAKGFQK  
SFYNRYGGGVNTVSDGYNKG TALGAEIIGTFVLVYTVFSATDPKRNARDS  
HVPVLAPLPIGFAVFMVHLATIPVTGTGINPARSFGPAVIFNNDKAWDDQW  
IYWVGPFVGAAVAIYHQYILRGS AIKALGSFRSNA\*

>GmPIP2;7

MAKDIEDEVQSGLP HKDYHDPPAAAFYDPAELRKWSFYRALIAEFVA  
TLLFLYVTILTVIGYNHQTATGSPDLCNGVGVLGIAWAFGGMIFVLVYCTA  
GISGGHINPAVTFGLFLARKVSLIRAVGYMVAQVLGAISGVGLVKALQKSY  
YNRYNGGVNMLADGYSKGTGLGAEIIGTFILVYTVFSATDPKRVARD SHV  
PVLAPLPIGFAVFIVHLATIPITGTGINPARSLGPAVIFNNEKAWDDQWIFW  
VGPFIGAIAAFYHQSVLRAQA AKAALGSFRSSSNL\*

>GmPIP2;8

MAKDLETEIQSGLP HKDYHDPPPAPFYDPAELRKWSFFRALIAEFVAT  
LLFLYVTILTVIGYNHQTATAAEPCSGVGVLGIAWAFGGMIFVLVYCTAGI  
SGGHINPAVTFGLFLARKVSLTRAVGYMVAQVLGAISGVGLVKALQKSY  
NRYKGGVNMLADGYSKGTGLGAEIIGTFILVYTVFSATDPKRVARD SHVP

**VLAPLPIGFAVFMVHLATIPITGTGINPARSLGPAVIFNNEKAWDDQWIFW  
VGPFIGAALAAFYHQSVLRAQAAKALGSFRSSNL\***

**>GmPIP2;9**

**MAKHDVEGGSFSAKDYHDPPPAPLIDAEELTQWSFYRALIAEFIATLL  
FLYITVLTVIGYKSQSDVKAGGDVCGGVGILGIAWAFGGMIFILVYCTAGI  
SGGHINPAVTFGLFLARKVSLIRAIMYMVAQCLGAICGVGLVKAFQKAYY  
NRYGGGANELSEGYSTGVGLGAEIIGTFVLVYTVFSATDPKRNARDSHVP  
VLAPLPIGFAVFMVHLATIPVTGTGINPARSLGAAVMYNQQKAWDDHWIF  
WVGPFIGAALAAFYHQFILRAGAANKALGSFRSNPTI\***
